# Supplementary material for: Whole-genome analysis of piscine reovirus (PRV) shows PRV represents a new genus in family Reoviridae and its genome segment S1 sequences group it into two separate sub-genotypes
Source: PubMed Central journal article supplement (PMC3711887; doi:10.1186/1743-422x-10-230), 2013-07-11
Supplement: 1743-422X-10-230-S4.pdf [file 1743-422X-10-230-S4.pdf]

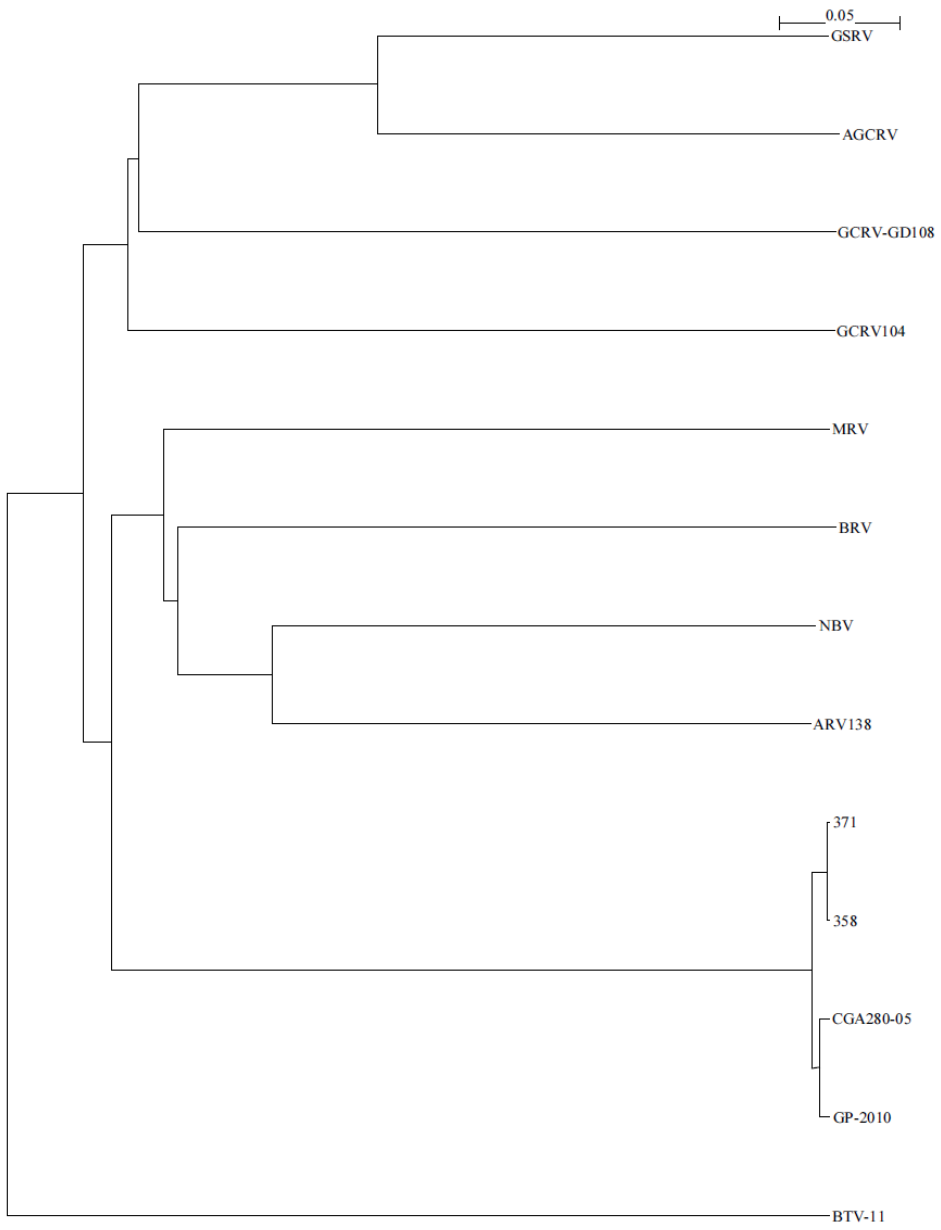

**A**

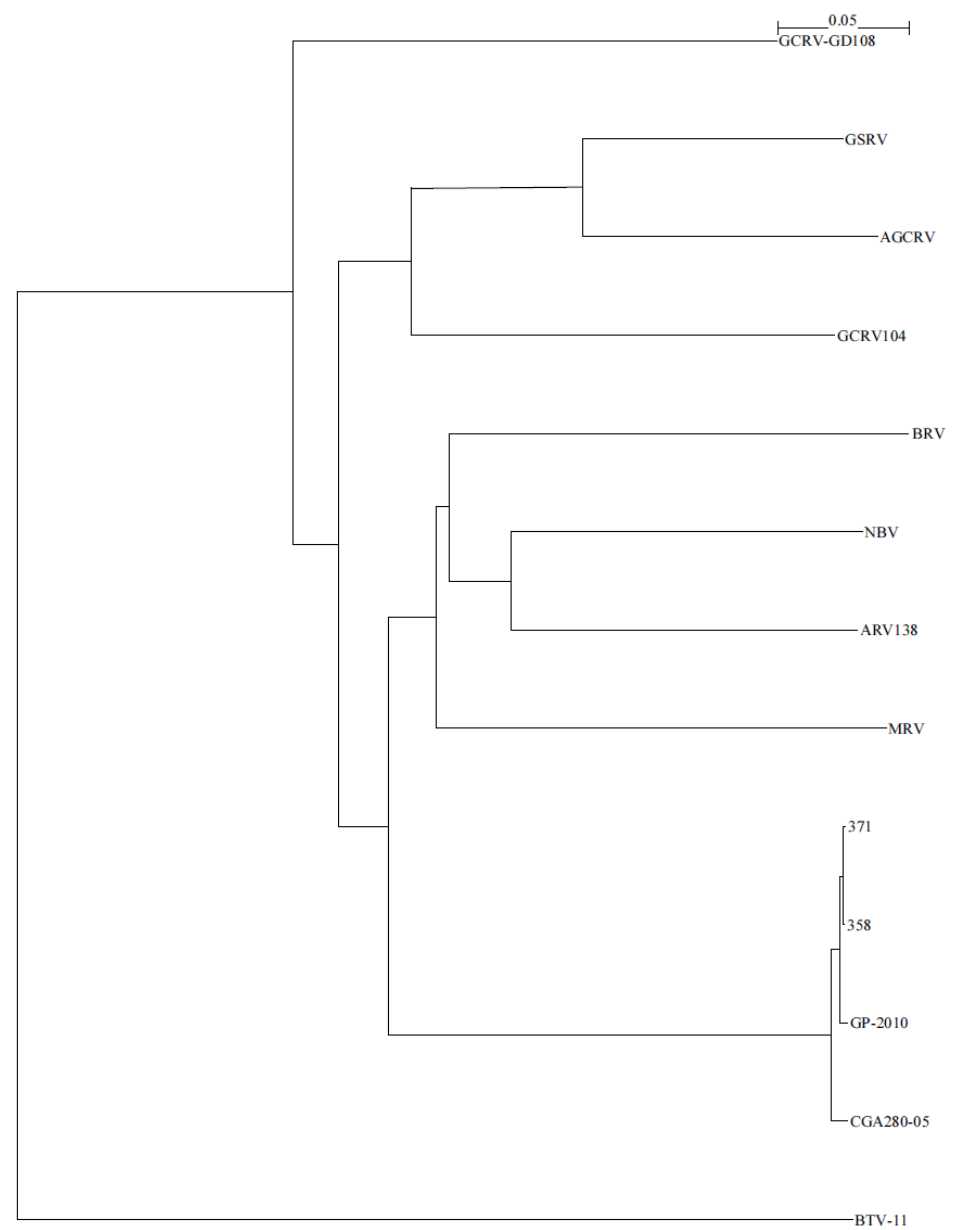

**B**
